# Supplementary material
Source: Elsevier journal article supplement (https://www.sciencedirect.com/science/article/pii/S0048712020301493)
Supplement: mmc1 [file S0048712020301493:mmc1.pdf]

## **ANEXO I. Cuestionario encuesta online para pacientes con lipedema**

---

La encuesta está dirigida a pacientes YA DIAGNOSTICADOS DE LIPEDEMA. El objetivo es mejorar la atención médica de esta enfermedad. Es anónima, voluntaria y le llevará unos 2 minutos.

Tenga en cuenta que el cumplimiento de la misma implica la cesión de sus respuestas para la publicación del estudio. De acuerdo a la LOPD, en ningún caso se almacenarán datos personales o direcciones que permitan identificarle.

Muchas gracias de antemano por su tiempo.

**P1. Sexo:** Mujer/ Hombre

**P2. Edad actual:**

**P3. Indique su provincia de residencia:**

**P4. Indique la edad a la que comenzaron sus síntomas:**

**P5. ¿A qué edad obtuvo el diagnóstico de lipedema?:**

**P6. ¿Qué profesional de la salud realizó el diagnóstico?**

- Médico de Atención Primaria (médico de cabecera)
- Médico rehabilitador
- Cirujano vascular
- Cirujano plástico
- Otros. Especifique: \_\_\_\_\_

**P7. ¿El diagnóstico se realizó en la Seguridad Social o en la Medicina Privada?**

- Seguridad Social
- Medicina Privada

**P8. ¿Cuántos médicos consultó antes de obtener el diagnóstico?**

- 1
- 2
- 3
- 4
- 5
- 6
- 7
- 8
- 9
- Más de 10

**P9. Por favor puntué del 0 (nula) al 10 (máxima posible) la mejoría que ha obtenido con los diferentes tratamientos. (Si no ha hecho ese tratamiento marque "no realizado")**

|                       | 0 | 1 | 2 | 3 | 4 | 5 | 6 | 7 | 8 | 9 | 10 | No realizado |
|-----------------------|---|---|---|---|---|---|---|---|---|---|----|--------------|
| Drenaje linfático     |   |   |   |   |   |   |   |   |   |   |    |              |
| Presoterapia          |   |   |   |   |   |   |   |   |   |   |    |              |
| Mesoterapia           |   |   |   |   |   |   |   |   |   |   |    |              |
| Prendas de compresión |   |   |   |   |   |   |   |   |   |   |    |              |
| Cirugía               |   |   |   |   |   |   |   |   |   |   |    |              |
| Pérdida de peso       |   |   |   |   |   |   |   |   |   |   |    |              |

**P10. ¿Tiene acceso a la prescripción médica y financiación por parte de la seguridad social de prendas de compresión (medias, leotardos, etc.) realizadas en ortopedia?**

- Si
- No
- No lo sé

☐ Acepto la cesión de mis respuestas de acuerdo a la Ley Orgánica de Protección de Datos 3/2018 de 5 de diciembre y garantía de los derechos digitales.
